# Supplementary material for: Clinical, biochemical, neuroradiological and molecular characterization of Egyptian patients with glutaric acidemia type 1
Source: Springer Nature journal article supplement (doi:10.1007/s11011-019-00422-3), 2019-05-06
Supplement: MOESM1 [file 16702722]

# **Clinical, biochemical, neuroradiological and molecular characterization of Egyptian patients with glutaric acidemia type 1**

Hatem Zayed<sup>1</sup>, Hamed El Khayat<sup>2</sup>, Hoda Tomoum<sup>2</sup>, Ola Khalifa<sup>2</sup>, Ehab Siddiq<sup>2</sup>, Shaimaa A Mohammad<sup>2</sup>,  
Radwa Gamal<sup>2</sup>, Zumin Shi<sup>1</sup>, Ahmed Mosailhy<sup>2</sup>, Osama K Zaki<sup>2</sup>

1. *College of Health Sciences, Biomedical Program, Qatar University, Doha, Qatar*

2. *Medical Genetics Unit, Pediatric Department, Faculty of Medicine, Ain-Shams University, Cairo, Egypt.*

## **\*Correspondence to:**

**Hatem Zayed, Ph.D.**, Department of Health Sciences, Biomedical Program, Qatar University, Doha, Qatar,  
hatem.zayed@qu.edu.qa

Phone: 00974-4403-4809

Fax: 00974-4403-1351

**Osama K Zaki, M.D., Ph.D.**, Genetics Unit, Ain Shams Pediatrics Hospital, Cairo, 11665  
ozaki@med.asu.edu.eg

Phone: +20105188879

Fax: 202 27712258

**Supplementary Table 1. Clinical data of the Egyptian patients with GA1**

| PATIENT N. | AGE<br>(MON) | SEX | RESIDENCE | FAMILY<br>HISTORY | CONSANGUINITY |
|------------|--------------|-----|-----------|-------------------|---------------|
| 1.         | 40.00        | F   | U         | -VE               | +VE           |
| 2.         | 33.00        | M   | L         | -VE               | +VE           |
| 3.         | 50.00        | M   | L         | -VE               | -VE           |
| 4.         | 89.00        | F   | L         | -VE               | +VE           |
| 5.         | 92.00        | M   | U         | +VE               | +VE           |
| 6.         | 73.00        | M   | U         | +VE               | +VE           |
| 7.         | 61.00        | F   | U         | +VE               | +VE           |
| 8.         | 92.00        | F   | L         | -VE               | +VE           |
| 9.         | 90.00        | M   | L         | +VE               | -VE           |
| 10.        | 70.00        | M   | L         | +VE               | -VE           |
| 11.        | 89.00        | M   | L         | -VE               | +VE           |
| 12.        | 87.00        | M   | U         | +VE               | +VE           |
| 13.        | 28.00        | F   | U         | +VE               | +VE           |
| 14.        | 104.00       | F   | U         | +VE               | -VE           |
| 15.        | 72.00        | M   | U         | +VE               | -VE           |
| 16.        | 64.00        | M   | U         | +VE               | +VE           |
| 17.        | 49.00        | M   | U         | +VE               | +VE           |
| 18.        | 81.00        | M   | L         | -VE               | +VE           |
| 19.        | 85.00        | M   | L         | +VE               | +VE           |
| 20.        | 82.00        | F   | U         | +VE               | +VE           |
| 21.        | 134.00       | M   | U         | +VE               | +VE           |
| 22.        | 53.00        | M   | U         | +VE               | +VE           |
| 23.        | 34.00        | M   | U         | +VE               | +VE           |
| 24.        | 103.00       | M   | L         | +VE               | +VE           |
| 25.        | 70.00        | M   | U         | -VE               | +VE           |
| 26.        | 31.00        | F   | U         | -VE               | +VE           |
| 27.        | 33.00        | M   | U         | -VE               | -VE           |
| 28.        | 98.00        | M   | L         | +VE               | +VE           |
| 29.        | 64.00        | M   | L         | +VE               | +VE           |
| 30.        | 57.00        | F   | U         | -VE               | +VE           |
| 31.        | 36.00        | M   | L         | -VE               | +VE           |
| 32.        | 36.00        | M   | L         | -VE               | +VE           |
| 33.        | 103.00       | F   | L         | -VE               | +VE           |
| 34.        | 106.00       | M   | U         | -VE               | +VE           |
| 35.        | 141.00       | F   | L         | -VE               | -VE           |
| 36.        | 70.00        | F   | L         | -VE               | +VE           |
| 37.        | 69.00        | M   | U         | -VE               | +VE           |
| 38.        | 66.00        | F   | L         | -VE               | +VE           |
| 39.        |              | M   | L         | -VE               | -VE           |
| 40.        | 59.00        | M   | U         | -VE               | -VE           |
| 41.        | 50.00        | F   | L         | -VE               | +VE           |
| 42.        | 76.00        | M   | L         | -VE               | -VE           |
| 43.        | 59.00        | M   | U         | -VE               | +VE           |
| 44.        | 82.00        | M   | L         | -VE               | +VE           |
| 45.        | 80.00        | F   | U         | -VE               | -VE           |
| 46.        | 99.00        | F   | U         | -VE               | -VE           |
| 47.        | 54.00        | M   | U         | -VE               | +VE           |
| 48.        | 120.00       | F   | L         | +VE               | -VE           |
| 49.        | 85.00        | M   | L         | +VE               | -VE           |
| 50.        | 108.00       | M   | L         | -VE               | +VE           |

|     |        |   |   |     |     |
|-----|--------|---|---|-----|-----|
| 51. | 140.00 | F | L | +VE | +VE |
| 52. | 105.00 | F | L | +VE | +VE |
| 53. | 95.00  | F | U | -VE | -VE |
| 54. | 87.00  | F | U | -VE | +VE |
| 55. | 104.00 | F | L | -VE | +VE |
| 56. | 107.00 | M | L | -VE | +VE |
| 57. | 215.00 | M | U | -VE | -VE |
| 58. | 107.00 | M | L | -VE | +VE |
| 59. | 149.00 | F | L | -VE | -VE |
| 60. | 111.00 | M | L | -VE | -VE |
| 61. | 88.00  | M | U | -VE | +VE |
| 62. | 83.00  | M | L | -VE | -VE |
| 63. | 252.00 | M | U | -VE | -VE |
| 64. | 132.00 | M | L | -VE | -VE |
| 65. | 71.00  | F | L | +VE | +VE |
| 66. | 54.00  | M | L | +VE | +VE |
| 67. | 87.00  | M | L |     | +VE |
| 68. |        | M | U | +VE | +VE |
| 69. |        | M | U | +VE | +VE |
| 70. | 88.00  | M | U | +VE | +VE |
| 71. | 100.00 | M | U | +VE | +VE |
| 72. | 98.00  | M | U | -VE | -VE |
| 73. |        | M | U | -VE | -VE |
| 74. | 100.00 | M | U | -VE | -VE |
| 75. | 59.00  | M | U | -VE | -VE |
| 76. | 55.00  | M | L | -VE | -VE |
| 77. |        | F | U | -VE | -VE |
| 78. |        | M | U | -VE | -VE |
| 79. |        | F | L | -VE | -VE |
| 80. |        | M | L | -VE | +VE |
| 81. |        | F | L | -VE | -VE |
| 82. | 187.00 | M | U | -VE | +VE |
| 83. | 50.00  | F | U | -VE | +VE |
| 84. |        | M | L | -VE | +VE |
| 85. | 36.00  | M | U | -VE | +VE |
| 86. | 88.00  | M | U | -VE | +VE |
| 87. |        | M | U | -VE | -VE |
| 88. | 30.00  | F | U | -VE | -VE |
| 89. | 69.00  | M | L | -VE | +VE |

**Supplementary Table 2. Clinical data of Egyptian patients with GAI**

| PATIENT N. | OFC CENTILE AT DIAGNOSIS | OFC (Z. SCORE) | MACROCEPHA LY | W.T CENTILE AT DIAGNOSIS | W.T (Z. SCORE) | LENGTH CENTILE AT DIAGNOSIS | LENGTH (Z. SCORE) |
|------------|--------------------------|----------------|---------------|--------------------------|----------------|-----------------------------|-------------------|
| 1.         | 25th                     | -0.662         | -VE           | 7th                      | 1.465          | 72 nd                       | 0.577             |
| 2.         | >99                      | 3.612          | +VE           | 30 <sup>th</sup>         | -0.512         | 60 <sup>th</sup>            | 0.233             |
| 3.         | 75                       | 0.594          | -VE           | 60 <sup>th</sup>         | 0.267          | 20 <sup>th</sup>            | -0.857            |
| 4.         | >99                      | 2.431          | +VE           | 6th                      | -1.596         | < 3rd                       | -2.629            |
| 5.         | 76th                     | 0.709          | -VE           | 4th                      | -1.775         | 21th                        | -0.826            |
| 6.         | >99                      | 3.796          | +VE           | 30th                     | -0.516         | 61th                        | 0.279             |
| 7.         | 65th                     | 0.377          | -VE           | 40 <sup>th</sup>         | -0.287         | 60 <sup>th</sup>            | 0.238             |
| 8.         | 6th                      | -1.572         | -VE           | 8th                      | -1.41          | < 3rd                       | -2.742            |
| 9.         | 98th                     | 1.983          | +VE           | 67th                     | 0.45           | 61th                        | 0.275             |
| 10.        | >99                      | 3.467          | +VE           | 40 <sup>th</sup>         | -0.287         | 60 <sup>th</sup>            | 0.234             |
| 11.        | >99                      | 3.836          | +VE           | 95th                     | 1.617          | 99th                        | 2.21              |
| 12.        | 18th                     | -0.919         | -VE           | < 3rd                    | -3.669         | < 3rd                       | -4.948            |
| 13.        | < 3rd                    | -3.48          | -VE           | < 3rd                    | -3.298         | < 3rd                       | -2.845            |
| 14.        | >99                      | 3.675          | +VE           | 40 <sup>th</sup>         | -0.282         | 60 <sup>th</sup>            | 0.241             |
| 15.        | >99                      | 3.554          | +VE           | 40 <sup>th</sup>         | -0.280         | 60 <sup>th</sup>            | 0.232             |
| 16.        | >99                      | 2.693          | +VE           | < 3rd                    | -3.663         | < 3rd                       | -6.251            |
| 17.        | 65th                     | 0.375          | -VE           | 87th                     | 1.14           | 3rd                         | -1.913            |
| 18.        | 99th                     | 6.697          | +VE           | 92nd                     | 1.397          | < 3rd                       | -2.853            |
| 19.        | >99                      | 4.65           | +VE           | 13th                     | -1.127         | 97th                        | 1.823             |
| 20.        | 99th                     | 2.279          | +VE           | 91th                     | 1.358          | 99th                        | 6.014             |
| 21.        | >99                      | 3.323          | +VE           | 40 <sup>th</sup>         | -0.287         | 60 <sup>th</sup>            | 0.232             |
| 22.        | >99                      | 4.65           | +VE           | < 3 rd                   | -2.505         | < 3 rd                      | -2.627            |
| 23.        | >99                      | 2.934          | +VE           | 40 <sup>th</sup>         | -0.281         | 60 <sup>th</sup>            | 0.237             |
| 24.        | 99th                     | 2.601          | +VE           | 6th                      | -1.52          | < 3rd                       | -2.988            |
| 25.        | 99th                     | 2.539          | +VE           | 34th                     | -0.409         | 86th                        | 1.059             |
| 26.        | >99                      | 3.905          | +VE           | 30th                     | -0.512         | 6th                         | -1.56             |
| 27.        | >99                      | 3.058          | +VE           | 89th                     | 1.206          | 91st                        | 1.368             |
| 28.        | 50th                     | -0.008         | -VE           | < 3rd                    | -2.472         | 20th                        | -0.857            |
| 29.        | 79th                     | 0.803          | -VE           | 40 <sup>th</sup>         | -0.287         | 60 <sup>th</sup>            | 0.243             |
| 30.        | 32nd                     | -0.48          | -VE           | 7th                      | -1.516         | 71st                        | 0.544             |
| 31.        | 99th                     | 2.747          | +ve           | 30th                     | -0.53          | 59th                        | 0.231             |
| 32.        | >99                      | 3.504          | +VE           | 40 <sup>th</sup>         | -0.286         | 60 <sup>th</sup>            | 0.243             |
| 33.        | 99th                     | 2.185          | +ve           | < 3rd                    | -2.653         | 75th                        | 0.643             |
| 34.        | >99                      | 3.031          | +ve           | 66th                     | 0.401          | 20th                        | -0.857            |
| 35.        | >99                      | 3.411          | +VE           | 40 <sup>th</sup>         | -0.287         | 60 <sup>th</sup>            | 0.241             |
| 36.        | < 3rd                    | -2.663         | -VE           | < 3rd                    | -3.054         | < 3rd                       | -2.011            |
| 37.        | >99                      | 2.669          | +ve           | 5th                      | -5.052         | 60 <sup>th</sup>            | 0.240             |
| 38.        | 92nd                     | 2.103          | -VE           | 40 <sup>th</sup>         | -0.286         | 60 <sup>th</sup>            | 0.243             |
| 39.        | >99                      | 3.412          | +VE           | 40 <sup>th</sup>         | -0.284         | 60 <sup>th</sup>            | 0.245             |
| 40.        | >99                      | 3.745          | +VE           | 40 <sup>th</sup>         | -0.289         | 60 <sup>th</sup>            | 0.243             |
| 41.        | 99th                     | 2.401          | +VE           | < 3rd                    | -2.749         | 45th                        | -0.127            |
| 42.        | >99                      | 3.792          | +VE           | 40 <sup>th</sup>         | -0.282         | 60 <sup>th</sup>            | 0.247             |
| 43.        | >95                      | 2.47           | -VE           | 97th                     | 2.494          | 47th                        | -0.07             |
| 44.        | >99                      | 2.669          | +VE           | 26th                     | -0.635         | 23rd                        | -0.736            |
| 45.        | >99                      | 3.255          | +VE           | 11th                     | -1.218         | 81st                        | 0.859             |
| 46.        | >99                      | 3.404          | +VE           | 16th                     | -0.99          | 95th                        | 1.66              |
| 47.        | >99                      | 4.835          | +VE           | 16th                     | -1.01          | 38th                        | -0.313            |
| 48.        | 99th                     | 4.597          | +VE           | 21th                     | -0.807         | 39th                        | -0.276            |
| 49.        | 99th                     | 4.889          | +VE           | 71th                     | 0.558          | 99th                        | 2.776             |

|     |       |        |     |                  |        |                  |        |
|-----|-------|--------|-----|------------------|--------|------------------|--------|
| 50. | 9th   | -1.381 | -VE | < 3rd            | -5.079 | < 3rd            | -5.688 |
| 51. | 5th   | -1.802 | -VE | < 3rd            | -3.994 | 60 <sup>th</sup> | 0.240  |
| 52. | 43d   | -0.172 | -VE | < 3rd            | -2.226 | 60 <sup>th</sup> | 0.293  |
| 53. | 84th  | 0.975  | -VE | 57th             | 0.167  | 97th             | 1.822  |
| 54. | >99th | 2.669  | +ve | 98th             | 1.994  | 60 <sup>th</sup> | 0.244  |
| 55. | 99th  | 3.49   | +VE | 20th             | -0.759 | 99th             | 2.223  |
| 56. | 98th  | 1.983  | +VE | 98th             | 3.915  | 98th             | 3.914  |
| 57. | < 3rd | -2.8   | -VE | 5th              | -7.926 | 5th              | -4.753 |
| 58. | 98th  | 2.119  | +VE | 42nd             | -0.196 | 60 <sup>th</sup> | 0.238  |
| 59. | < 3rd | -3.96  | -VE | < 3rd            | -2.581 | < 3rd            | -4.092 |
| 60. | 6th   | -1.541 | -VE | < 3rd            | -3.716 | 3rd              | -3.746 |
| 61. | 35th  | -0.423 | -VE | < 3rd            | -2.551 | 40th             | -0.269 |
| 62. | 98th  | 2.147  | +VE | 9th              | -1.481 | 9th              | -1.517 |
| 63. | 10th  | -1.333 | -VE | 5th              | -4.939 | 5th              | -6.021 |
| 64. | 40th  | -0.253 | -VE | 10th             | -1.278 | < 3rd            | -4.396 |
| 65. | 99th  | 2.43   | +VE | 57th             | 0.167  | 20th             | -1.281 |
| 66. | 69th  | 0.494  | -VE | 40 <sup>th</sup> | -0.187 | 60 <sup>th</sup> | 0.243  |
| 67. | 27th  | -0.621 | -VE | 3rd              | -1.892 | 2nd              | -2.574 |
| 68. | 99th  | 2.248  | +VE | < 3rd            | -3.832 | 21st             | -0.826 |
| 69. | >99   | 3.404  | +VE | 40 <sup>th</sup> | -0.287 | 60 <sup>th</sup> | 0.243  |
| 70. | >99   | 3.417  | +VE | 40 <sup>th</sup> | -0.287 | 60 <sup>th</sup> | 0.235  |
| 71. | 99th  | 3.773  | +VE | 40 <sup>th</sup> | -0.287 | 60 <sup>th</sup> | 0.248  |
| 72. | 99th  | 2.28   | +VE | 63th             | 0.328  | 60 <sup>th</sup> | 0.244  |
| 73. | >99   | 3.356  | +VE | 45 <sup>th</sup> | -0.123 | 60 <sup>th</sup> | 0.234  |
| 74. | >99   | 3.478  | +VE | 45 <sup>th</sup> | -0.122 | 60 <sup>th</sup> | 0.237  |
| 75. | >99   | 3.564  | +VE | 45 <sup>th</sup> | -0.121 | 60 <sup>th</sup> | 0.245  |
| 76. | 99th  | 2.389  | +VE | 54 <sup>th</sup> | 0.101  | 60 <sup>th</sup> | 0.241  |
| 77. | >99   | 3.452  | +VE | 45 <sup>th</sup> | -0.126 | 60 <sup>th</sup> | 0.243  |
| 78. | >99   | 3.884  | +VE | 45 <sup>th</sup> | -0.127 | 60 <sup>th</sup> | 0.236  |
| 79. | >99   | 3.477  | +VE | 45 <sup>th</sup> | -0.129 | 23 <sup>rd</sup> | -0.737 |
| 80. | 96th  | 1.756  | -VE | 45 <sup>th</sup> | -0.121 | 60 <sup>th</sup> | 0.240  |
| 81. | 31st  | -0.501 | -VE | < 3rd            | -5.497 | 60 <sup>th</sup> | 0.241  |
| 82. | >99th | 3.151  | +VE | 99 <sup>th</sup> | 5.309  | 99 <sup>th</sup> | 5.367  |
| 83. | >99   | 3.411  | +VE | 45 <sup>th</sup> | -0.126 | 60 <sup>th</sup> | 0.242  |
| 84. | 98th  | 2.045  | +VE | 70 <sup>th</sup> | 0.488  | 80 <sup>th</sup> | 0.843  |
| 85. | 97th  | 1.777  | +VE | 45 <sup>th</sup> | -0.129 | 70 <sup>th</sup> | 0.562  |
| 86. | 98th  | 2.147  | +VE | 13 <sup>th</sup> | -1.147 | 99 <sup>th</sup> | 2.776  |
| 87. | >99   | 3.488  | +VE | 45 <sup>th</sup> | -0.127 | 70 <sup>th</sup> | 0.567  |
| 88. | >99   | 3.932  | +VE | 45 <sup>th</sup> | -0.122 | 70 <sup>th</sup> | 0.569  |
| 89. | >99   | 3.473  | +VE | 45 <sup>th</sup> | -0.120 | 70 <sup>th</sup> | 0.563  |

**Supplementary Table 3. Clinical data of the Egyptian patients with GA1**

| PATIENT N | DYSTONIA | DYSTONIA<br>MOVEMENT<br>SCALE | DYSTONIA<br>DISABILITY<br>SCALE | ABORTIONS | SIB DEATH |
|-----------|----------|-------------------------------|---------------------------------|-----------|-----------|
| 1.        | -VE      | 0                             | 0                               | 0         | +VE       |
| 2.        | -VE      | 0                             | 0                               | 0         | -VE       |
| 3.        | -VE      | 0                             | 0                               | 0         | -VE       |
| 4.        | -VE      | 0                             | 0                               | 3         | -VE       |
| 5.        | +VE      | 52.5                          | 28                              | 1         | +VE       |
| 6.        | -VE      | 0                             | 0                               | 1         | +VE       |
| 7.        | +VE      |                               |                                 | 1         | +VE       |

|     |     |      |    |   |     |
|-----|-----|------|----|---|-----|
| 8.  | -VE | 0    | 0  | 0 | -VE |
| 9.  | -VE | 0    | 0  | 1 | +VE |
| 10. | +VE | 4    | 28 | 0 | -VE |
| 11. | +VE | 48   | 30 | 1 | -VE |
| 12. | -VE | 0    | 0  | 1 | +VE |
| 13. | +VE | 70   | 30 | 2 | +VE |
| 14. | -VE | 0    | 0  | 0 | -VE |
| 15. | +VE | 59.5 | 29 | 0 | -VE |
| 16. | -VE | 0    | 0  | 0 | +VE |
| 17. | +VE | 29.5 | 30 | 0 | +VE |
| 18. | -VE | 0    | 0  | 0 | +VE |
| 19. | +VE | 102  | 29 | 0 | +VE |
| 20. | +VE | 50.5 | 30 | 1 | -VE |
| 21. | +VE |      |    | 0 | -VE |
| 22. | +VE | 3    | 17 | 0 | -VE |
| 23. | +VE |      |    | 0 | -VE |
| 24. | +VE |      |    | 0 | +VE |
| 25. | -VE | 0    | 0  | 0 | -VE |
| 26. | +VE |      |    | 0 | -VE |
| 27. | +VE |      |    | 0 | -VE |
| 28. | +VE | 30   | 0  | 0 | -VE |
| 29. | +VE |      |    | 0 | -VE |
| 30. | +VE | 2    | 8  | 0 | -VE |
| 31. | +VE | 10.5 | 0  | 0 | -VE |
| 32. | +VE | 12   | 26 | 0 | -VE |
| 33. | -VE | 0    | 0  | 1 | +VE |
| 34. | -VE | 0    | 0  | 1 | -VE |
| 35. | -VE | 0    | 0  | 0 | -VE |
| 36. | -VE | 0    | 0  | 1 | -VE |
| 37. | +VE | 52.5 | 28 | 0 | -VE |
| 38. | -VE | 0    | 0  | 0 | -VE |
| 39. | +VE |      |    | 0 | -VE |
| 40. | -VE | 0    | 0  | 0 | -VE |
| 41. | -VE | 0    | 0  | 1 | -VE |
| 42. | +VE | 4    | 28 | 0 | -VE |
| 43. | +VE | 48   | 30 | 0 | -VE |
| 44. | -VE | 0    | 0  | 0 | -VE |
| 45. | +VE | 70   | 30 | 0 | -VE |
| 46. | -VE | 0    | 0  | 0 | -VE |
| 47. | +VE | 59.5 | 29 | 0 | -VE |
| 48. | -VE | 0    | 0  | 0 | -VE |
| 49. | +VE | 29.5 | 30 | 0 | -VE |
| 50. | -VE | 0    | 0  | 0 | +VE |
| 51. | +VE | 102  | 29 | 0 | -VE |
| 52. | +VE | 50.5 | 30 | 0 | -VE |
| 53. | +VE |      |    | 0 | -VE |
| 54. | +VE | 3    | 17 | 0 | -VE |
| 55. | +VE |      |    | 0 | -VE |
| 56. | +VE |      |    | 0 | -VE |
| 57. | -VE | 0    | 0  | 0 | -VE |
| 58. | +VE |      |    | 0 | +VE |
| 59. | +VE |      |    | 0 | -VE |
| 60. | +VE | 30   | 0  | 0 | -VE |

|     |     |      |    |   |     |
|-----|-----|------|----|---|-----|
| 61. | +VE |      |    | 1 | -VE |
| 62. | +VE | 2    | 8  | 0 | -VE |
| 63. | +VE | 10.5 | 0  | 1 | -VE |
| 64. | +VE | 12   | 26 | 0 | -VE |
| 65. | -VE | 0    | 0  | 0 | -VE |
| 66. | -VE | 0    | 0  | 0 | -VE |
| 67. | -VE | 0    | 0  | 2 | -VE |
| 68. | -VE | 0    | 0  | 0 | -VE |
| 69. | +VE | 52.5 | 28 | 0 | -VE |
| 70. | -VE | 0    | 0  | 0 | -VE |
| 71. | +VE |      |    | 0 | -VE |
| 72. | -VE | 0    | 0  | 0 | -VE |
| 73. | -VE | 0    | 0  | 0 | -VE |
| 74. | +VE | 4    | 28 | 0 | -VE |
| 75. | +VE | 48   | 30 | 0 | -VE |
| 76. | -VE | 0    | 0  | 1 | -VE |
| 77. | +VE | 70   | 30 | 0 | -VE |
| 78. | -VE | 0    | 0  | 0 | -VE |
| 79. | +VE | 59.5 | 29 | 0 | -VE |
| 80. | -VE | 0    | 0  | 1 | -VE |
| 81. | +VE | 29.5 | 30 | 0 | +VE |
| 82. | -VE | 0    | 0  | 0 | -VE |
| 83. | +VE | 102  | 29 | 0 | -VE |
| 84. | +VE | 50.5 | 30 | 1 | -VE |
| 85. | +VE |      |    | 2 | -VE |
| 86. | +VE | 3    | 17 | 0 | -VE |
| 87. | +VE |      |    | 0 | -VE |
| 88. | +VE |      |    | 0 | -VE |
| 89. | -VE | 0    | 0  | 0 | -VE |

**Supplementary Figure 4. Clinical data of Egyptian patients with GA1**

| Patient N. | Age of onset(M) | Delay in diagnosis(M) | Type of onset | Onset-Associated intercurrent infection | Intra Cranial Hge | Convulsions | Morbidity Score | Fate& severity |
|------------|-----------------|-----------------------|---------------|-----------------------------------------|-------------------|-------------|-----------------|----------------|
| 1.         | 5               | 7.00                  | acute         | +VE                                     | -VE               | -VE         | 1               | mild           |
| 2.         |                 |                       | acute         | +VE                                     | -VE               | +VE         | 2               | moderate       |
| 3.         |                 |                       | acute         | +VE                                     | -VE               | +VE         | 2               | moderate       |
| 4.         | 3               | 6.00                  | acute         | +VE                                     | -VE               | +VE         | 4               | Severe         |
| 5.         | 7               | 7.00                  | acute         | +VE                                     | +VE               | -VE         | 3               | Severe         |
| 6.         | 2.7             | 0.30                  | insidious     | -VE                                     | -VE               | +VE         | 3               | Severe         |
| 7.         |                 |                       | acute         | +VE                                     | -VE               | +VE         | 4               | Severe         |
| 8.         | 6               | 9.00                  | Screening     | -VE                                     | -VE               | -VE         | 0               | mild           |

|     |      |        |           |     |     |     |   |          |
|-----|------|--------|-----------|-----|-----|-----|---|----------|
| 9.  | 12   | 6.00   | acute     | +VE | -VE | -VE | 3 | Severe   |
| 10. |      | 0.00   | Screening | -VE | -VE | -VE | 0 | mild     |
| 11. | 6    | 6.00   | acute     | +VE | -VE | -VE | 0 | mild     |
| 12. | 0    | 24.00  | acute     | +VE | -VE | +VE | 4 | Severe   |
| 13. | 0.17 | 0.00   | insidious | -VE | -VE | -VE | 2 | moderate |
| 14. |      | 0.00   | acute     | +VE | -VE | -VE | 0 | mild     |
| 15. |      | 0.00   | insidious | -VE | -VE | -VE | 3 | Severe   |
| 16. | 3    | 3.00   | acute     | +VE | +VE | +VE | 4 | Severe   |
| 17. | 0    | 0.17   | insidious | -VE | -VE | -VE | 1 | mild     |
| 18. | 2    | 11.00  | insidious | -VE | -VE | -VE | 0 | mild     |
| 19. | 4    | 2.00   | insidious | -VE | -VE | -VE | 3 | severe   |
| 20. | 0    | 12.00  | acute     | +VE | -VE | -VE | 0 | mild     |
| 21. | 0    | 72.00  | insidious | -VE | -VE | -VE | 0 | mild     |
| 22. | 1.5  | 4.50   | acute     | +VE | -VE | +VE | 2 | moderate |
| 23. |      |        | acute     | +VE | -VE | -VE | 0 | mild     |
| 24. | 10   | 9.00   | acute     | +VE | -VE | -VE | 3 | severe   |
| 25. | 9    | 2.00   | acute     | +VE | -VE | -VE | 1 | mild     |
| 26. | 11   | 9.00   | acute     | +VE | -VE | +VE | 2 | moderate |
| 27. | 6    | 6.00   | acute     | +VE | -VE | -VE | 2 | moderate |
| 28. | 6    | 10.00  | insidious | -VE | -VE | -VE | 3 | severe   |
| 29. | 1    | 0.00   | Screening | -VE | -VE | -VE | 0 | mild     |
| 30. | 14   | 1.00   | acute     | +VE | -VE | +VE | 3 | severe   |
| 31. |      |        | insidious | -VE | -VE | -VE | 1 | mild     |
| 32. |      |        | acute     | +VE | +VE | +VE | 3 | severe   |
| 33. | 0    | 6.00   | acute     | +VE | -VE | +VE | 4 | severe   |
| 34. | 12   | 4.00   | acute     | +VE | -VE | +VE | 2 | moderate |
| 35. |      | 0.00   | insidious | -VE | -VE | -VE | 3 | severe   |
| 36. | 7    | 8.00   | acute     | +VE | +VE | +VE | 4 | severe   |
| 37. | 0    | 12.00  | acute     | +VE | -VE | +VE | 4 | Severe   |
| 38. | 5.5  | 0.50   | acute     | +VE | -VE | -VE | 3 | severe   |
| 39. |      | 0.00   | acute     | +VE | -VE | -VE | 1 | mild     |
| 40. |      | 0.00   | acute     | +VE | -VE | +VE | 2 | moderate |
| 41. | 0    | 7.00   | acute     | +VE | -VE | -VE | 1 | mild     |
| 42. |      |        | acute     | +VE | -VE | -VE | 2 | moderate |
| 43. |      |        | acute     | +VE | +VE | -VE | 3 | severe   |
| 44. |      |        | Screening | -VE | -VE | -VE | 1 | mild     |
| 45. |      |        | acute     | +VE | -VE | +VE | 3 | severe   |
| 46. | 6    | 60.00  | acute     | +VE | -VE | +VE | 4 | Severe   |
| 47. |      |        | acute     | +VE | -VE | -VE | 2 | moderate |
| 48. | 9    | 27.00  | acute     | +VE | -VE | +VE | 4 | severe   |
| 49. | 4    | 7.00   | acute     | +VE | -VE | -VE | 1 | mild     |
| 50. | 14   | 22.00  | acute     | +VE | -VE | +VE | 4 | severe   |
| 51. | 7    | 39.00  | acute     | +VE | -VE | +VE | 4 | Severe   |
| 52. | 3    | 7.00   | Screening | -VE | -VE | -VE | 0 | mild     |
| 53. | 10   | 5.00   | acute     | +VE | -VE | +VE | 3 | severe   |
| 54. | 7    | 5.00   | acute     | +VE | -VE | +VE | 2 | moderate |
| 55. | 0    | 8.00   | insidious | -VE | -VE | -VE | 2 | moderate |
| 56. | 2    | 6.00   | acute     | +VE | -VE | +VE | 4 | severe   |
| 57. | 1    | 119.00 | insidious | -VE | -VE | +VE | 3 | severe   |
| 58. | 6    | 11.00  | acute     | +VE | -VE | +VE | 4 | severe   |
| 59. | 12   | 49.00  | acute     | +VE | -VE | +VE | 3 | severe   |
| 60. | 14   | 13.00  | acute     | +VE | -VE | +VE | 4 | severe   |
| 61. | 7    | 1.00   | acute     | +VE | -VE | +VE | 3 | severe   |
| 62. | 6    | 5.00   | acute     | +VE | -VE | +VE | 4 | severe   |
| 63. | 0    | 177.00 | insidious | -VE | -VE | +VE | 3 | severe   |
| 64. | 7    | 14.00  | acute     | +VE | -VE | +VE | 4 | Severe   |
| 65. | 15   | 0.00   | acute     | +ve | -VE | -VE | 1 | mild     |
| 66. | 0    | 0.33   | Screening | -VE | -VE | -VE | 0 | mild     |
| 67. | 0    | 35.00  | insidious | -VE | -VE | -VE | 2 | moderate |



|     |    |       |           |     |     |     |   |          |
|-----|----|-------|-----------|-----|-----|-----|---|----------|
| 68. | 5  | 9.00  | acute     | +VE | -VE | +VE | 4 | Severe   |
| 69. |    |       | Screening | -VE | -VE | -VE | 0 | mild     |
| 70. | 18 | 8.00  | acute     | +VE | -VE | -VE | 2 | moderate |
| 71. | 0  | 38.00 | insidious | -VE | -VE | -VE | 0 | mild     |
| 72. | 7  | 5.00  | acute     | +VE | -VE | +VE | 2 | moderate |
| 73. |    | 0.00  | acute     | +VE | -VE | -VE | 0 | mild     |
| 74. |    | 0.00  | acute     | +VE | -VE | -VE | 1 | mild     |
| 75. |    | 0.00  | acute     | +VE | -VE | -VE | 2 | moderate |
| 76. | 0  | 9.00  | acute     | +VE | -VE | -VE | 1 | mild     |
| 77. |    |       | acute     | +VE | -VE | -VE | 2 | moderate |
| 78. |    |       | acute     | +VE | -VE | -VE | 2 | moderate |
| 79. | 6  | 2.00  | acute     | +VE | -VE | -VE | 2 | moderate |
| 80. |    |       | acute     | +VE | -VE | -VE | 1 | mild     |
| 81. | 0  | 84.00 | Screening | -VE | -VE | -VE | 1 | mild     |
| 82. | 0  | 72.00 | insidious | -VE | -VE | -VE | 0 | mild     |
| 83. | 5  | 12.00 | acute     | +VE | +VE | -VE | 2 | moderate |
| 84. | 6  | 1.00  | acute     | +VE | -VE | +VE | 2 | moderate |
| 85. | 0  | 8.50  | insidious | -VE | -VE | -VE | 1 | mild     |
| 86. | 7  | 4.00  | acute     | +VE | -VE | +VE | 2 | moderate |
| 87. |    |       | acute     | +VE | -VE | -VE | 1 | mild     |
| 88. |    |       | acute     | +VE | -VE | -VE | 1 | mild     |
| 89. |    |       | acute     | +VE | -VE | -VE | 1 | mild     |

**Supplementary Figure 5. Neuroradiological data of the Egyptian patients with GA1**

| <b>Patient N.</b> | <b>Tone</b> | <b>Gross motor</b> | <b>Fine Motor</b> | <b>Speech</b> | <b>Cognitive</b> |
|-------------------|-------------|--------------------|-------------------|---------------|------------------|
| 1.                | N           | mild               | mild              | mild          | mild             |
| 2.                | hyper       | severe             | moderate          | moderate      | mild             |
| 3.                | hyper       | severe             | moderate          | moderate      | mild             |
| 4.                | hypo        | severe             | severe            | severe        | moderate         |
| 5.                | hyper       | severe             | severe            | severe        | mild             |
| 6.                | hyper       | severe             | moderate          | moderate      | mild             |
| 7.                | hyper       | moderate           | moderate          | moderate      | mild             |
| 8.                | N           | mild               | mild              | mild          | mild             |
| 9.                | hyper       | severe             | severe            | severe        | moderate         |
| 10.               | N           | mild               | mild              | mild          | mild             |
| 11.               | N           | mild               | mild              | mild          | mild             |
| 12.               | hyper       | severe             | severe            | severe        | mild             |
| 13.               | hypo        | moderate           | moderate          | moderate      | moderate         |
| 14.               | N           | mild               | mild              | mild          | mild             |
| 15.               | hyper       | severe             | severe            | severe        | mild             |
| 16.               | hyper       | severe             | severe            | severe        | mild             |
| 17.               | hypo        | moderate           | moderate          | moderate      | mild             |
| 18.               | hypo        | severe             | severe            | severe        | mild             |
| 19.               | hyper       | severe             | moderate          | moderate      | mild             |
| 20.               | hypo        | moderate           | mild              | mild          | mild             |
| 21.               | hypo        | mild               | moderate          | mild          | mild             |
| 22.               | hypo        | moderate           | moderate          | moderate      | moderate         |
| 23.               | N           | mild               | mild              | mild          | mild             |
| 24.               | hyper       | severe             | severe            | severe        | mild             |
| 25.               | N           | mild               | mild              | mild          | mild             |
| 26.               | hyper       | severe             | severe            | moderate      | moderate         |
| 27.               | hyper       | severe             | moderate          | severe        | mild             |
| 28.               | hyper       | severe             | moderate          | mild          | mild             |
| 29.               | hypo        | mild               | moderate          | moderate      | mild             |

|     |       |          |          |          |          |
|-----|-------|----------|----------|----------|----------|
| 30. | hyper | severe   | moderate | moderate | mild     |
| 31. | hypo  | moderate | moderate | moderate | mild     |
| 32. | hyper | severe   | moderate | moderate | mild     |
| 33. | hyper | severe   | severe   | severe   | mild     |
| 34. | hyper | severe   | moderate | moderate | moderate |
| 35. | hyper | severe   | moderate | moderate | mild     |
| 36. | hyper | severe   | moderate | moderate | moderate |
| 37. | hyper | severe   | severe   | severe   | mild     |
| 38. | hyper | severe   | severe   | severe   | mild     |
| 39. | N     | mild     | mild     | mild     | mild     |
| 40. | hyper | severe   | moderate | severe   | mild     |
| 41. | hypo  | severe   | moderate | moderate | mild     |
| 42. | hyper | severe   | moderate | moderate | mild     |
| 43. | hyper | severe   | severe   | moderate | mild     |
| 44. | hypo  | severe   | severe   | moderate | mild     |
| 45. | hyper | severe   | severe   | severe   | mild     |
| 46. | hyper | severe   | moderate | severe   | mild     |
| 47. | hyper | severe   | severe   | severe   | moderate |
| 48. | hyper | severe   | severe   | moderate | mild     |
| 49. | hypo  | mild     | moderate | mild     | mild     |
| 50. | hyper | severe   | moderate | moderate | moderate |
| 51. | hyper | severe   | severe   | severe   | mild     |
| 52. | N     | mild     | mild     | mild     | mild     |
| 53. | hyper | severe   | moderate | moderate | mild     |
| 54. | hyper | severe   | moderate | moderate | moderate |
| 55. | hyper | severe   | moderate | moderate | mild     |
| 56. | hyper | severe   | severe   | moderate | mild     |
| 57. | hyper | severe   | moderate | moderate | mild     |
| 58. | hyper | severe   | severe   | severe   | mild     |
| 59. | hyper | severe   | severe   | severe   | moderate |
| 60. | hyper | severe   | severe   | severe   | moderate |
| 61. | hyper | severe   | severe   | severe   | mild     |
| 62. | hyper | severe   | severe   | severe   | mild     |
| 63. | hyper | moderate | moderate | moderate | mild     |
| 64. | hyper | moderate | moderate | moderate | mild     |
| 65. | hypo  | moderate | mild     | mild     | mild     |
| 66. | hypo  | moderate | moderate | mild     | mild     |
| 67. | hyper | severe   | severe   | severe   | mild     |
| 68. | hyper | severe   | severe   | severe   | mild     |
| 69. | hypo  | moderate | moderate | moderate | mild     |
| 70. | hyper | severe   | moderate | moderate | mild     |
| 71. | hypo  | mild     | mild     | moderte  | mild     |
| 72. | hyper | severe   | moderate | severe   | mild     |
| 73. | hypo  | moderate | severe   | severe   | mild     |
| 74. | hypo  | moderate | moderate | severe   | mild     |
| 75. | hyper | severe   | severe   | severe   | mild     |
| 76. | hypo  | moderate | severe   | moderate | moderate |
| 77. | hyper | severe   | severe   | moderate | mild     |
| 78. | hyper | severe   | moderate | moderate | mild     |
| 79. | hyper | severe   | moderate | severe   | mild     |
| 80. | hypo  | moderate | moderate | moderate | moderate |
| 81. | hypo  | moderate | moderate | moderate | mild     |
| 82. | hypo  | moderate | moderate | moderate | mild     |
| 83. | hyper | severe   | moderate | moderate | mild     |
| 84. | hyper | severe   | moderate | moderate | mild     |
| 85. | hypo  | moderate | moderate | mild     | mild     |
| 86. | hyper | severe   | moderate | severe   | mild     |
| 87. | hypo  | moderate | severe   | moderate | mild     |
| 88. | hypo  | moderate | severe   | mild     | mild     |

|     |      |          |        |          |      |
|-----|------|----------|--------|----------|------|
| 89. | hypo | moderate | severe | moderate | mild |
|-----|------|----------|--------|----------|------|

**Supplementary Table 6. Biochemical data of the Egyptian patients with GA1**

| <b>Patient</b> | <b>C5DC Level<br/>(uMol/L)</b> | <b>GC-MS(GA and 3-OH-<br/>GA)</b> | <b>Excretor</b> |
|----------------|--------------------------------|-----------------------------------|-----------------|
| 1.             | 2.39                           | Massive                           | high excretor   |
| 2.             | 1,33                           | Highly                            | high excretor   |
| 3.             | 1.37                           | Highly                            | high excretor   |
| 4.             | 4.48                           | Massive                           | high excretor   |
| 5.             | 3.05                           | Massive                           | high excretor   |
| 6.             | 2.06                           | Highly                            | high excretor   |
| 7.             | 1.02                           | Highly                            | high excretor   |
| 8.             | 1.56                           | Highly                            | high excretor   |
| 9.             | 0.39                           | Small                             | low excretor    |
| 10.            | 1.32                           | Highly                            | high excretor   |
| 11.            | 2.24                           | Highly                            | high excretor   |
| 12.            | 1.42                           | Highly                            | high excretor   |
| 13.            | 3.59                           | Massive                           | high excretor   |
| 14.            | 0.78                           | Highly                            | high excretor   |
| 15.            | 0.63                           | Highly                            | high excretor   |
| 16.            | 6.93                           | Massive                           | high excretor   |
| 17.            | 1.88                           | Highly                            | high excretor   |
| 18.            | 2.02                           | Highly                            | high excretor   |
| 19.            | 2.49                           | Highly                            | high excretor   |
| 20.            | 11.2                           | Highly                            | high excretor   |
| 21.            | 1.84                           | Highly                            | high excretor   |
| 22.            | 1.44                           | Highly                            | high excretor   |
| 23.            | 0.95                           | Highly                            | high excretor   |
| 24.            | 6.43                           | Massive                           | high excretor   |
| 25.            | 1.92                           | Highly                            | high excretor   |
| 26.            | 2.49                           | Massive                           | high excretor   |
| 27.            | 1.22                           | Highly                            | high excretor   |
| 28.            | 5.51                           | Massive                           | high excretor   |
| 29.            | 0.99                           | Highly                            | high excretor   |
| 30.            | 1.06                           | Highly                            | high excretor   |
| 31.            | 0.65                           | Highly                            | high excretor   |
| 32.            | 2.05                           | Highly                            | high excretor   |
| 33.            | 2.73                           | Highly                            | high excretor   |
| 34.            | 0.63                           | Highly                            | high excretor   |
| 35.            | 0.66                           | Highly                            | high excretor   |
| 36.            | 1.76                           | Highly                            | high excretor   |
| 37.            | 3.17                           | Massive                           | high excretor   |
| 38.            | 1.66                           | Highly                            | high excretor   |
| 39.            | 1.02                           | Highly                            | high excretor   |
| 40.            | 2.17                           | Highly                            | high excretor   |
| 41.            | 0.8                            | Highly                            | high excretor   |
| 42.            | 0.9                            | Highly                            | high excretor   |
| 43.            | 3.25                           | Highly                            | high excretor   |

|     |      |         |               |
|-----|------|---------|---------------|
| 44. | 2.87 | Highly  | high excretor |
| 45. | 3.98 | Massive | high excretor |
| 46. | 1.06 | Highly  | high excretor |
| 47. | 4.26 | Massive | high excretor |
| 48. | 1.42 | Highly  | high excretor |
| 49. | 1.91 | Highly  | high excretor |
| 50. | 1.44 | Highly  | high excretor |
| 51. | 1.54 | Highly  | high excretor |
| 52. | 1.57 | Highly  | high excretor |
| 53. | 0.39 | Small   | low excretor  |
| 54. | 1.34 | Highly  | high excretor |
| 55. | 1.44 | Highly  | high excretor |
| 56. | 3.07 | Massive | high excretor |
| 57. | 0.76 | Highly  | high excretor |
| 58. | 0.77 | Highly  | high excretor |
| 59. | 0.37 | Small   | low excretor  |
| 60. | 0.83 | Highly  | high excretor |
| 61. | 0.9  | Highly  | high excretor |
| 62. | 0.59 | Highly  | high excretor |
| 63. | 3.42 | Massive | high excretor |
| 64. | 0.4  | Highly  | high excretor |
| 65. | 1.35 | Highly  | high excretor |
| 66. | 0.94 | Highly  | high excretor |
| 67. | 1.21 | Highly  | high excretor |
| 68. | 4.32 | Massive | high excretor |
| 69. | 2.12 | Highly  | high excretor |
| 70. | 1.22 | Highly  | high excretor |
| 71. | 0.88 | Highly  | high excretor |
| 72. | 0.41 | Small   | low excretor  |
| 73. | 0.54 | Highly  | high excretor |
| 74. | 0.79 | Highly  | high excretor |
| 75. | 1.04 | Highly  | high excretor |
| 76. | 3.75 | Massive | high excretor |
| 77. | 1.26 | Highly  | high excretor |
| 78. | 2.12 | Highly  | high excretor |
| 79. | 0.94 | Highly  | high excretor |
| 80. | 0.35 | Small   | low excretor  |
| 81. | 1.53 | Highly  | high excretor |
| 82. | 0.57 | Highly  | high excretor |
| 83. | 0.37 | Small   | low excretor  |
| 84. | 0.75 | Highly  | high excretor |
| 85. | 1.09 | Highly  | high excretor |
| 86. | 0.64 | Highly  | high excretor |
| 87. | 0.76 | Highly  | high excretor |
| 88. | 4.23 | Massive | high excretor |
| 89. | 1.21 | Highly  | high excretor |
